# Supplementary material
Source: PubMed Central journal article supplement (PMC2390682)
Supplement: rsbl20070067s21.pdf [file rsbl20070067s21.pdf]

Electronic supplementary material for:

doi:10.1098/rsbl.2007.0067

Southern Hemisphere humpback whales wintering off Central America: insights from water temperature into the longest mammalian migration

By: K. Rasmussen, D. M. Palacios, J. Calambokidis, M. T. Saborío, L. Dalla Rosa, E. R. Secchi, G. H. Steiger, J. M. Allen, and G. S. Stone

**THE DISTRIBUTION OF HUMPBACK WHALE WINTERING AREAS WORLDWIDE  
IN RELATION TO SEA-SURFACE TEMPERATURE**

We conducted a review of the literature based on modern research to determine the location of humpback whale wintering areas worldwide, using the criteria described in the Methods section (see table A1 for a listing of sources). One known humpback whale population inhabiting the Arabian Sea was not included in this study because it does not appear to undertake seasonal migrations, but rather remains in tropical waters year-round (Mikhalev 1997). A total of 24 areas were identified, all within 30° of the equator. For three of these, information was inconclusive as to whether they are a true wintering area or part of the migratory route, but were still included in the analysis. Specifically, for the two Japanese areas, the Ryukyu and Bonin Island groups (F1 and F2 in figure 2 and table A1), calving may actually occur further south (Mori *et al.* 1998; Ohizumi *et al.* 2002). It also is unclear whether Baja California (B1), Mexico,

is an area used for calving, as humpback whales there are seen as early as September (Urban-R & Aguayo-L 1987), suggesting that this area may be a migratory corridor for whales going further south.

A polygon delineating the approximate extent of each wintering area was drawn over digital maps of climatological sea-surface temperature (SST) for the month of peak calving occurrence: February for the Northern Hemisphere and August for the Southern Hemisphere (Chittleborough 1958; Clapham & Mead 1999). The average SST and the standard deviation for all pixels inside a polygon were computed for each one of the 24 areas identified. These values are reported in table A1, where a letter code is used to identify each area in figure 2 of the paper (these letter codes bear no relationship to the Southern Hemisphere stock designations by the International Whaling Commission, IWC). The average SST for all wintering areas was 24.6°C ( $\pm 1.9^\circ\text{C}$  s.d.). The three ambiguous areas B1, F1, and F2 had the lowest SSTs (21.09-21.91°C), such that if they were excluded, the global average would be 25.1°C ( $\pm 1.4^\circ\text{C}$  s.d.).

The relationship between mean latitude and mean SST at the wintering areas is presented in figure A1 in the context of latitudinal global SST range. Most wintering areas occur at or above the global mean SST for that latitude (colored curves in figure A1), and they are generally closer to the upper end of the global SST range (shaded areas in figure A1). In addition, with a few noteworthy exceptions, humpback whale wintering areas do not occur within 10° of the equator. At these latitudes, there is an actual dip in SST due to wind-induced equatorial upwelling processes, as evidenced by the colored curves in figure A1. The exceptions are the wintering areas for eastern South Pacific and eastern South Atlantic humpback whales, which migrate to the warm waters found north of the equator (see figure 2), and the wintering area for eastern North Pacific whales off Panama and Costa Rica, which may migrate past (south) of the

localized upwellings that occur in the Gulfs of Tehuantepec and Papagayo during boreal winter (see figure 2). These observations indicate that there is a global correlation between the distribution of humpback whale wintering areas and SST.

Finally, the Cape Verde Islands, a wintering area for eastern North Atlantic humpback whales (Reiner *et al.* 1996; Hazevoet & Wenzel 2000; Jann *et al.* 2003), stand out as an outlier in SST-latitude space (figure A1) due to their low mean SST (22.1°C), which is, again, influenced by low-latitude upwelling processes. Similarly low SSTs occur at the Gálapagos Islands in the eastern equatorial Pacific (figure 1), where recent research suggests that this archipelago may be a wintering area for eastern South Pacific humpback whales (Félix *et al.* 2006; D. M. Palacios, unpublished observations). We suggest that humpback whales may winter in areas with less than optimal water temperatures in areas that offer shallow, protected conditions, especially as populations continue to recover from depletion.

## REFERENCES

- Chittleborough, R. G. 1958 The breeding cycle of the female humpback whales, *Megaptera nodosa* (Bonnaterre). *Aus. J. Mar. Freshwater Res.* 9, 1-18.
- Clapham, P. J. & Mead, J. G. 1999 *Megaptera novaeangliae*. *Mamm. Spec.* 604, 1-9.
- Félix, F., Palacios, D. M., Caballero, S., Haase, B. & Falconí, J. 2006 The 2005 Galápagos Humpback Whale Expedition: a first attempt to assess and characterize the population in the archipelago. Paper SC/A06/HW15 presented to the IWC Workshop on the Comprehensive Assessment of Southern Hemisphere humpback whales, Hobart, Tasmania, 4–7 April 2006.

[Paper available from the Office of the International Whaling Commission, The Red House, 135 Station Road, Impington, Cambridge, Cambridgeshire CB4 9NP, UK].

- Hazevoet, C. J. & Wenzel, F. W. 2000 Whales and dolphins (Mammalia, Cetacea) of the Cape Verde Islands, with special reference to the humpback whale *Megaptera novaeangliae* (Borowski, 1781). *Contr. Zool.* 69, 197-211.
- Jann, B., Allen, J., Carrillo, M., Hanquet, S., Katona, S. K., Martin, A. R., Reeves, R. R., Seton, R., Stevick, P. T. & Wenzel, F. W. 2003 Migration of a humpback whale (*Megaptera novaeangliae*) between the Cape Verde Islands and Iceland. *J. Cetacean Res. Manage.* 5, 125-129.
- Mikhalev, Y. A. 1997 Humpback whales *Megaptera novaeangliae* in the Arabian Sea. *Mar. Ecol. Prog. Ser.* 149, 13-21.
- Mori, K., Sato, F., Yamaguchi, M., Suganuma, H. & Ueyanagi, S. 1998 Distribution, migration and local movements of humpback whale (*Megaptera novaeangliae*) in the adjacent waters of the Ogasawara (Bonin) Islands, Japan. *J. School of Mar. Sci. and Tech.* 45, 197-213.
- Ohizumi, H., Matsuishi, T. & Kishino, H. 2002 Winter sightings of humpback and Bryde's whales in tropical waters of the western and central North Pacific. *Aquat. Mamm.* 28, 73-77.
- Reiner, F., Dos Santos, M. E. & Wenzel, F. W. 1996 Cetaceans of the Cape Verde Archipelago. *Mar. Mamm. Sci.* 12, 434-443.
- Urban-R, J. & Aguayo-L, A. 1987 Spatial and seasonal distribution of the humpback whale, *Megaptera novaeangliae*, in the Mexican Pacific. *Mar. Mamm. Sci.* 3, 333-344.

Table A1. Climatological sea-surface temperature (SST, °C) and standard deviation (s.d., °C) for humpback whale wintering areas in both the Northern and Southern Hemispheres shown in figure 2. The northernmost, southernmost, easternmost, and westernmost coordinates of each polygon are given. Literature sources are listed below.

|                     |                                                   |       |      | geographic coordinates |        |         |         |
|---------------------|---------------------------------------------------|-------|------|------------------------|--------|---------|---------|
|                     |                                                   |       |      | N                      | S      | E       | W       |
| Northern Hemisphere |                                                   | SST   | SD   | N                      | S      | E       | W       |
| A                   | Hawaii <sup>1,2</sup>                             | 24.15 | 0.31 | 22.44                  | 17.74  | -153.50 | -160.59 |
| B1                  | Mexico: Baja California <sup>3</sup>              | 21.09 | 0.79 | 25.65                  | 21.81  | -108.29 | -112.33 |
| B2                  | Mexico: mainland <sup>3</sup>                     | 24.05 | 0.84 | 22.98                  | 18.62  | -103.85 | -107.21 |
| B3                  | Mexico: Revillagigedos <sup>3</sup>               | 24.32 | 0.30 | 20.11                  | 17.96  | -110.36 | -115.31 |
| C                   | Central America <sup>4</sup>                      | 28.27 | 0.96 | 11.42                  | 7.25   | -80.79  | -85.62  |
| D                   | West Indies <sup>5,6</sup>                        | 26.11 | 0.27 | 21.95                  | 10.49  | -60.03  | -71.62  |
| E                   | Cape Verde Islands <sup>7,8,9</sup>               | 22.10 | 0.36 | 17.37                  | 14.47  | -22.51  | -25.68  |
| F1                  | Japan: Ryukyu Islands <sup>10,11,12,13</sup>      | 21.60 | 0.44 | 29.81                  | 24.66  | 131.31  | 126.32  |
| F2                  | Japan: Bonin Islands <sup>11,12,13,14,15,16</sup> | 21.91 | 1.13 | 28.74                  | 23.33  | 143.47  | 140.30  |
| F3                  | Mariana Islands <sup>12,16</sup>                  | 26.96 | 0.42 | 20.06                  | 12.92  | 146.56  | 144.43  |
| Southern Hemisphere |                                                   | SST   | SD   | N                      | S      | E       | W       |
| G                   | Tonga <sup>17,18</sup>                            | 24.34 | 0.68 | -18.00                 | -21.97 | -173.18 | -176.41 |
| H                   | Cook Islands <sup>17,18,19</sup>                  | 25.07 | 0.63 | -18.07                 | -21.72 | -156.02 | -163.15 |
| I                   | Polynesia <sup>17,18,20</sup>                     | 25.93 | 0.88 | -14.08                 | -22.05 | -139.05 | -153.04 |
| J                   | Central America <sup>4</sup>                      | 28.00 | 0.79 | 11.17                  | 6.86   | -78.27  | -86.40  |
| K                   | Colombia and Ecuador <sup>21,22,23,24,25</sup>    | 25.67 | 2.23 | 7.13                   | -2.79  | -76.76  | -81.70  |
| L                   | Brazil <sup>26,27,28</sup>                        | 25.37 | 1.05 | -5.02                  | -19.73 | -34.21  | -40.72  |
| M                   | West Africa <sup>29,30,31,31</sup>                | 24.89 | 2.79 | 7.11                   | -3.35  | 11.39   | 1.85    |
| N                   | East Africa <sup>29</sup>                         | 24.08 | 1.84 | -14.92                 | -26.66 | 42.76   | 32.42   |
| O                   | S Madagascar <sup>29,33,34,35</sup>               | 23.20 | 0.61 | -21.77                 | -27.14 | 49.39   | 42.29   |
| P                   | NE Madagascar <sup>34</sup>                       | 24.02 | 0.22 | -15.19                 | -18.06 | 51.22   | 48.30   |
| Q                   | NW Australia <sup>26,37,38,39</sup>               | 25.54 | 0.90 | -14.71                 | -19.86 | 126.08  | 120.61  |
| R                   | NE Australia <sup>40,41,42</sup>                  | 23.43 | 0.87 | -17.08                 | -21.78 | 151.06  | 147.01  |
| S                   | New Caledonia <sup>17,18,43</sup>                 | 23.30 | 0.57 | -18.99                 | -23.23 | 167.73  | 162.79  |
| T                   | Samoa <sup>18</sup>                               | 26.25 | 0.50 | -13.70                 | -17.94 | 169.60  | 165.27  |

<sup>1</sup>Herman, L. M. & Antinoya, R. C. 1977 Humpback whales in the Hawaiian breeding waters: population and pod characteristics. *Sci. Rep. Whales Res. Inst.* 29, 59-85.

- <sup>2</sup>Baker, C. S. & Herman, L. M. 1981 Migration and local movement of humpback whales (*Megaptera novaeangliae*) through Hawaiian waters. *Can. J. Zool.* 59, 460-469.
- <sup>3</sup>Urban-R, J. & Aguayo-L, A. 1987 Spatial and seasonal distribution of the humpback whale, *Megaptera novaeangliae*, in the Mexican Pacific. *Mar. Mamm. Sci.* 3, 333-344.
- <sup>4</sup>Rasmussen, K. 2006. Comparison of two distinct populations of humpback whales (*Megaptera novaeangliae*) off Pacific Central America. M.S. Thesis, Moss Landing Marine Laboratories, San Francisco State University, San Francisco, CA. 90 pp.
- <sup>5</sup>Whitehead, H. & Moore, M. J. 1982 Distribution and movements of West Indian humpback whales in winter. *Can. J. Zool.* 60, 2203-2211.
- <sup>6</sup>Winn, H. E., Edel, R. K. & Taruski, A. G. 1975 Population estimate of the humpback whale (*Megaptera novaeangliae*) in the West Indies by visual and acoustic techniques. *J. Fish. Res. Board Can.* 32, 499-506.
- <sup>7</sup>Reiner, F., Dos Santos, M. E. & Wenzel, F. W. 1996 Cetaceans of the Cape Verde Archipelago. *Mar. Mamm. Sci.* 12, 434-443.
- <sup>8</sup>Hazevoet, C. J. & Wenzel, F. W. 2000 Whales and dolphins (Mammalia, Cetacea) of the Cape Verde Islands, with special reference to the humpback whale *Megaptera novaeangliae* (Borowski, 1781). *Contr. Zool.* 69, 197-211.
- <sup>9</sup>Jann, B., Allen, J., Carrillo, M., Hanquet, S., Katona, S. K., Martin, A. R., Reeves, R. R., Seton, R., Stevick, P. T. & Wenzel, F. W. 2003 Migration of a humpback whale (*Megaptera novaeangliae*) between the Cape Verde Islands and Iceland. *J. Cetacean Res. Manage.* 5, 125-129.
- <sup>10</sup>Nishiwaki, N. 1959 Humpback whales in Ryukyuan waters. *Sci. Rep. Whales Res. Inst.* 14, 49-87.
- <sup>11</sup>Nishiwaki, N. 1966. Distribution and migration of the larger cetaceans in the North Pacific as shown by Japanese whaling Results. In *Whales, dolphins and porpoises* (ed. K. S. Norris), pp 171-191. Berkeley: University of California Press.
- <sup>12</sup>Rice, D. 1974 Whales and whale research in the eastern North Pacific. In *The whale problem* (ed. W.E. Schevill), pp. 170-195. Cambridge: Harvard University Press.
- <sup>13</sup>Darling, J. D. & Mori, K. 1993 Recent observations of humpback whales (*Megaptera novaeangliae*) in Japanese waters off Ogasawara and Okinawa. *Can. J. Zool.* 71, 325-333.
- <sup>14</sup>Omura, H. 1950. Whales in the adjacent waters of Japan. *Sci. Rep. Whales Res. Inst.* 4, 27-113.
- <sup>15</sup>Mori, K., Sato, F., Yamaguchi, M., Suganuma, H. & Ueyanagi, S. 1998 Distribution, migration and local movements of humpback whale (*Megaptera novaeangliae*) in the adjacent waters of the Ogasawara (Bonin) Islands, Japan. *J. School of Mar. Sci. Tech.* 45, 197-213.
- <sup>16</sup>Ohizumi, H., Matsuishi, T. & Kishino, H. 2002 Winter sightings of humpback and Bryde's whales in tropical waters of the western and central North Pacific. *Aquat. Mamm.* 28, 73-77.
- <sup>17</sup>Garrigue, C., Greaves, J. & Chambellant, M. 2002 Characteristics of the New Caledonian humpback whale population. *Mem. Qld. Mus.* 47, 539-546.
- <sup>18</sup>Garrigue, C., Dodemont, R., Steel, D. & Baker, C. S. 2004 Organismal and 'genetic' capture-recapture using microsatellite genotyping confirm low abundance and reproductive autonomy of humpback whales on the wintering grounds of New Caledonia. *Mar. Ecol. Prog. Ser.* 274, 251-262.
- <sup>19</sup>Hauser, N., Peckham, H. & Clapham, P. 2000 Humpback whales in the southern Cook Islands, South Pacific. *J. Cetacean Res. Manage.* 2, 159-164.
- <sup>20</sup>Gannier, A. 2004 The large-scale distribution of humpback whales (*Megaptera novaeangliae*) wintering in French Polynesia during 1997-2002. *Aquat. Mamm.* 30, 227-336.

- <sup>21</sup>Clarke, R. 1962 Whale observation and whale marking off the coast of Chile in 1958 and from Ecuador towards and beyond the Galápagos Islands in 1959. *Norsk Hvalfangsttid.* 51, 265-87.
- <sup>22</sup>Flórez-González, L. 1991 Humpback whales *Megaptera novaeangliae* in the Gorgona Island, Colombian Pacific breeding waters: population and pod characteristics. *Mem. Qld. Mus.* 30, 291-295.
- <sup>23</sup>Flórez-González, L., Capella-A., J., Haase, B., Bravo, G. A., Félix, F. & Gerrodette, T. 1998 Changes in winter destinations and the northernmost record of Southeastern Pacific humpback whales. *Mar. Mamm. Sci.* 14, 189-196.
- <sup>24</sup>Scheidat, M., Castro, C., Denkinger, J., González, J. & Adelung, D. 2000 A breeding area for humpback whales (*Megaptera novaeangliae*) off Ecuador. *J. Cetacean Res. Manage.* 2, 165-171.
- <sup>25</sup>Félix, F. & Haase, B. 2001 The humpback whale off the coast of Ecuador, population parameters and behavior. *Rev. Biol. Mar. Ocean.* 36, 61-74.
- <sup>26</sup>Siciliano, S. 1995. Report of the Scientific Committee, Annex E. Report of the Sub-Committee on Southern Hemisphere Baleen Whales, Appendix 6. Preliminary report on the occurrence and photo-identification of humpback whales in Brazil. *Rep. int. Whal. Commn.* 45:138-40.
- <sup>27</sup>Martins, C. C. A., Morete, M. E., Engel, M. H., Freitas, A. C., Secchi, E. R. & Kinas, P. G. 2001 Aspects of habitat use patterns of humpback whales in the Abrolhos Bank, Brazil, breeding ground. *Mem. Qld. Mus.* 47, 563-570.
- <sup>28</sup>Zerbini, A. N., Andriolo, A., Rocha, J., Simoes-Lopes, P. C., Siciliano, S., Pizzorno, J. L., Waite, J. M., De Master, D. P. & Van Blaricom, G. R. 2004 Winter distribution and abundance of humpback whales (*Megaptera novaeangliae*) off northeastern Brazil. *J. Cetacean Res. Manage.* 6, 101-107.
- <sup>29</sup>Findlay, K. P., Best, P. B., Peddemors, V. M. & Gove, D. 1994 The distribution and abundance of humpback whales on their southern and central Mozambique winter grounds. *Rep. int. Whal. Commn.* 44, 311-320.
- <sup>30</sup>Darling, J. D. & Sousa-Lima R. S. 2005 Songs indicate interaction between humpback whale populations in the western and eastern South Atlantic Ocean. *Mar. Mamm. Sci.* 21,557-566.
- <sup>31</sup>Van Waerebeek, K., Tchibozo, S., Montcho, J., Nobime, G., Sohoun, Z., Sehounhoue, P. and Dossou, C. 2001. The Bight of Benin, a North Atlantic breeding ground of a Southern Hemisphere humpback whale population, likely related to Gabon and Angola substocks. Paper SC/53/IA21 presented to the IWC Scientific Committee, July 2001, London (unpublished) [Paper available from the Office of the International Whaling Commission, The Red House, 135 Station Road, Impington, Cambridge, Cambridgeshire CB4 9NP, UK].
- <sup>32</sup>Walsh, P. D., Fay, J. M., Gulick, S. & Sounguet, G. P. 2000 Humpback whale activity near Cap Lopez, Gabon. *J. Cetacean Res. Manage.* 2, 63-67.
- <sup>33</sup>Best, P. 1994 The distribution and abundance of humpback whales off southern Madagascar, August-September 1994. *Rep. int. Whal. Commn.* Paper SC/47/SH15.
- <sup>34</sup>Rosenbaum, H. C., Walsh, P. D., Razafindrakoto, Y., Vely, M. & DeSalle, R. 1997 First description of a humpback whale wintering ground in Baie d'Antongil, Madagascar. *Cons. Biol.* 11, 312-314.
- <sup>35</sup>Ersts, P. J. & Rosenbaum, H. C. 2003 Habitat preference reflects social organization of humpback whales (*Megaptera novaeangliae*) on a wintering ground. *J. Zool.* 260, 337-345.
- <sup>36</sup>Chittleborough, R. G. 1954. Aerial observations on the humpback whales, with notes on other species. *Aust. J. Mar. Fresh. Fish.* 4, 219-226.

- <sup>37</sup>Dawbin, W. H. & Gill, P. C., 1991 humpback whales songs along the coast of Western Australia and some comparison with east coast songs. *Mem. Qld. Mus.* 30, 249-254.
- <sup>38</sup>Jenner, K. C. S. & Jenner, M. N. 1994 A preliminary population estimate of the group IV breeding stock of humpback whales off Western Australia. *Rep. int. Whal. Commn* 44, 303-307.
- <sup>39</sup>Jenner, K. C. S. & Jenner, M. N. & McCabe, K. A. 2001 Geographical and temporal movements of humpback whales in Western Australian waters. *Aus. Petrol. Prod. Expl. Assoc. J.* 41, 749-765.
- <sup>40</sup>Paterson, R. & Paterson, P. 1984 A study of the past and present status of humpback whales in east Australian waters. *Biol. Cons.* 29, 321-343.
- <sup>41</sup>Simmons, M. L. & Marsh, H. 1986 Sightings of humpback whales in Great Barrier Reef waters. *Sci. Rep. Whales Res. Inst.* 37, 31-46.
- <sup>42</sup>Paterson, R. A. 1991 The migration of humpback whales *Megaptera novaeangliae* in east Australian waters. *Mem. Qld. Mus.* 30, 333-341.
- <sup>43</sup>Garrigue, C. & Gill, P. C. 1994 Observations of humpback whales *Megaptera novaeangliae* in New Caledonian waters during 1991-1993. *Biol. Cons.* 70, 211-218.



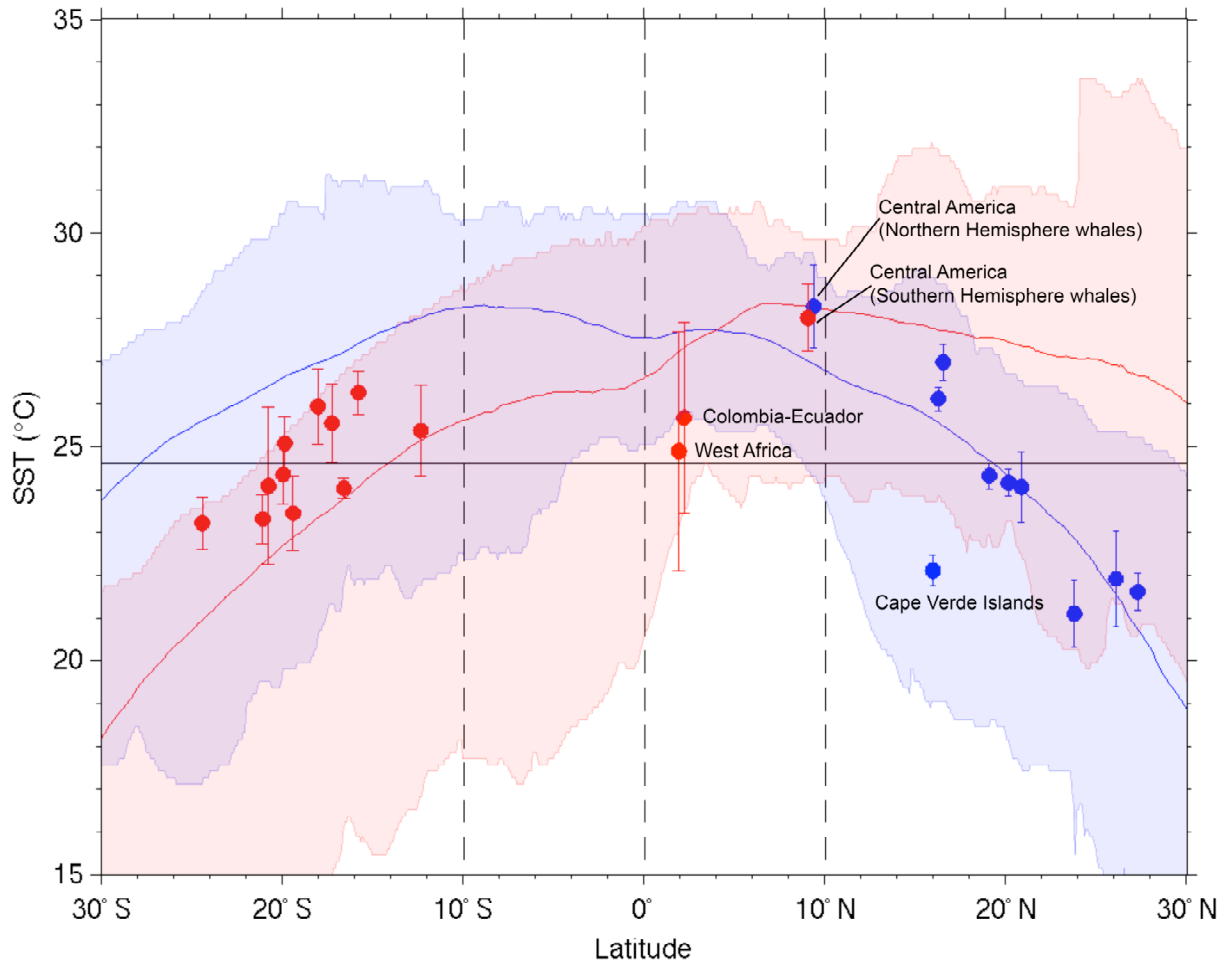

Figure A1. Mean latitude vs. mean SST at the wintering areas for Northern (blue circles) and Southern (red circles) Hemisphere humpback whale populations. Error bars are the standard deviations reported in table A1, and are a measure of the spatial variability of SST within each wintering area. Shaded areas represent the global range of SST at a given latitude for February (light blue) and for August (light red). Solid curves are the global mean (blue for February and red for August, respectively). Horizontal black line corresponds to the average SST for all wintering areas (24.6°C). Vertical black dashed lines at 10° S, 0°, and 10° N are drawn for reference. Names of selected wintering areas are mentioned in the text.
